# Supplementary material for: Single-component TADF gels: study of the positional isomer effect on gelation and morphological effect on conductivity
Source: Royal Society of Chemistry journal article supplement (doi:10.1039/d4cc02096k), 2024-01-01
Supplement: d4cc02096k1.pdf [file d4cc02096k1.pdf]

## Supporting information

# Single-Component TADF Gels: Study of Positional Isomer Effect on Gelation and Morphological Effect on Conductivity

Gyana Prakash Nanda, Savita, Suresh Rajamanickam, and Pachaiyappan Rajamalli\*

Address: Materials research Centre, Indian Institute of Science, Bangalore, India, 560012

Email: [rajamalli@iisc.ac.in](mailto:rajamalli@iisc.ac.in)

### Table of content

| SL No. | Content                             | Page No. |
|--------|-------------------------------------|----------|
| 1.     | General Information                 | 2        |
| 2.     | Materials                           | 2        |
| 3.     | Synthesis, NMR and HRMS             | 3-9      |
| 4.     | Gelation study                      | 9-10     |
| 5.     | Rheology study                      | 10-11    |
| 6.     | CSLM images                         | 11       |
| 7.     | Single crystal XRD                  | 11-15    |
| 8.     | Thin film XRD                       | 16       |
| 9.     | Photophysical studies               | 16-18    |
| 10.    | Powder XRD                          | 19       |
| 11.    | Lifetime measurement                | 19-20    |
| 12.    | Electrical conductivity measurement | 20-21    |
| 13.    | Reference                           | 21       |

## 1. General information

$^1\text{H}$  and  $^{13}\text{C}$  NMR were recorded in Bruker Advance 500 spectrometers, respectively. HRMS was measured using MAT-95XLHRMS. Single crystal XRDs were done in Bruker Smart Apex II Ultra X-ray diffractometer. UV-visible absorption spectra were recorded on a Jasco V-730 spectrophotometer. Fluorescence and phosphorescence spectra were recorded on a Hitachi F-7100 spectrophotometer. Photoluminescence quantum yield measurements were recorded on an integrated sphere setup connected with Hitachi F-7100 spectrophotometer. SEM images were taken from Carl Zeiss monochromator (MonoCL), CSLM images were taken from Leica SP8 Falcon (FLIM, FCS) confocal microscope. Transient photo luminance decay characteristics of the gel films were measured using an Edinburgh Instruments FLS980 spectrometer. The current-voltage measurement was done using a Keithley 2450 source meter. Powder XRD was measured in PANalytical X'Pert Pro X-ray diffractometer equipped with Cu K $\alpha$  source ( $\lambda = 1.5406 \text{ \AA}$ ).

## 2. Materials

The starting materials and reagents for the synthesis of emitters were commercially purchased and used without further purification. Deuterated solvent for nuclear magnetic resonance (NMR) was purchased from SYNMR CHEMICALS PVT.LTD.

## 3. Synthesis and NMR

Synthesis of 3,5-bis((3,6-di-*tert*-butyl-9*H*carbazol-9-yl)phenyl)(pyridin-4-yl)methanone (4BPy-*m*DTC)

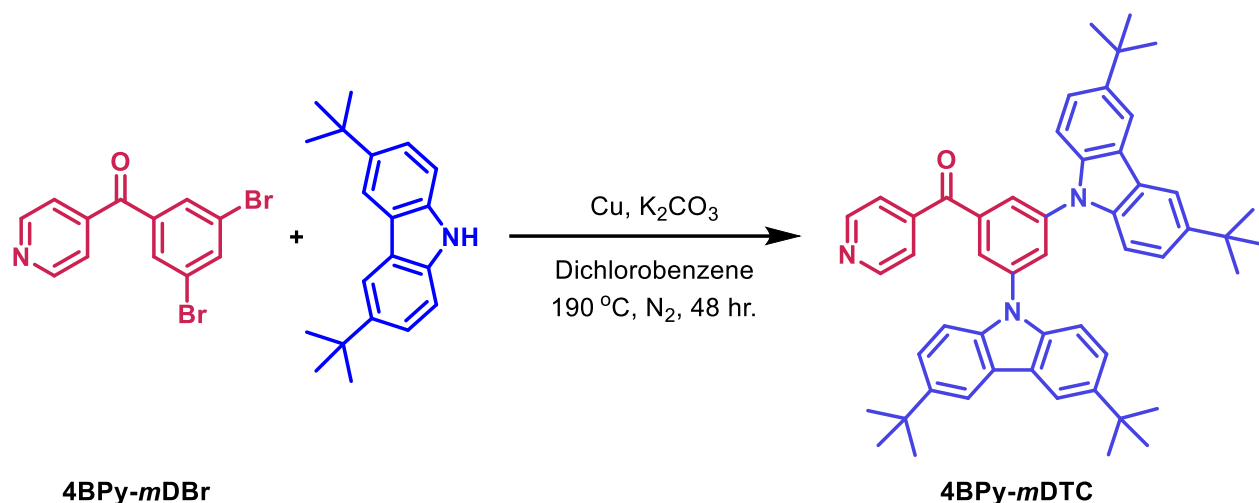

**Scheme S1.** Synthesis of 4BPY-*m*DTC.

4BPY-*m*DTC (3,5-bis(3,6-di-*tert*-butyl-9*H*-carbazol-9-yl)phenyl)(pyridin-4-yl)methanone) was synthesized using reported procedures.<sup>1</sup> In an oven-dried seal tube containing magnetic stir bar initially fitted with a septa was charged with 4BPY-*m*DBr (3.0 g, 8.8 mmol), 3,6-di-*tert*-butyl carbazole (5.41 g, 19.3 mmol), Cu powder (1.23 g, 19.3 mmol), and K<sub>2</sub>CO<sub>3</sub> (4.18 g, 38.7 mmol) was evacuated and purged with nitrogen gas three times. Under nitrogen atmosphere, anhydrous 1,2-dichlorobenzene (20 mL) was added to the reaction flask and sealed with a Teflon screw cap. The reaction mixture was stirred at 190 °C for 48 hours. After completion of the reaction, the mixture was cooled to room temperature and filtered through a short Celite and Silica pad, and washed three times with ethyl acetate. The combined filtrate was concentrated under reduced pressure and the residue was purified by a silica gel column chromatography using ethyl acetate/*n*-hexane as the eluent to afford light green coloured (3,5-bis(3,6-di-*tert*-butyl-9*H*-carbazol-9-yl)phenyl)(pyridin-4-yl)methanone in 54% yield (3.5 g). <sup>1</sup>H NMR (500 MHz, CDCl<sub>3</sub>) δ 8.82 (d, *J* = 6.0 Hz, 2H), 8.12 (d, *J* = 1.8 Hz, 4H), 8.08 (s, 1H), 8.03 (d, *J* = 2.0 Hz, 2H), 7.69 (d, *J* = 6.1 Hz, 2H), 7.50 – 7.41 (m, 8H), 1.44 (s, 36H); <sup>13</sup>C NMR (126 MHz, CDCl<sub>3</sub>) δ 201.50, 150.82, 144.00, 143.58, 140.54, 139.21, 138.61, 128.65, 125.65, 124.13, 123.98, 122.85, 116.71, 108.95, 34.88, 32.04. HRMS (ES<sup>+</sup>-TOF): *m/z* calcd for C<sub>52</sub>H<sub>56</sub>N<sub>3</sub>O [M + H]<sup>+</sup>, 738.4423 found, 738.4421.

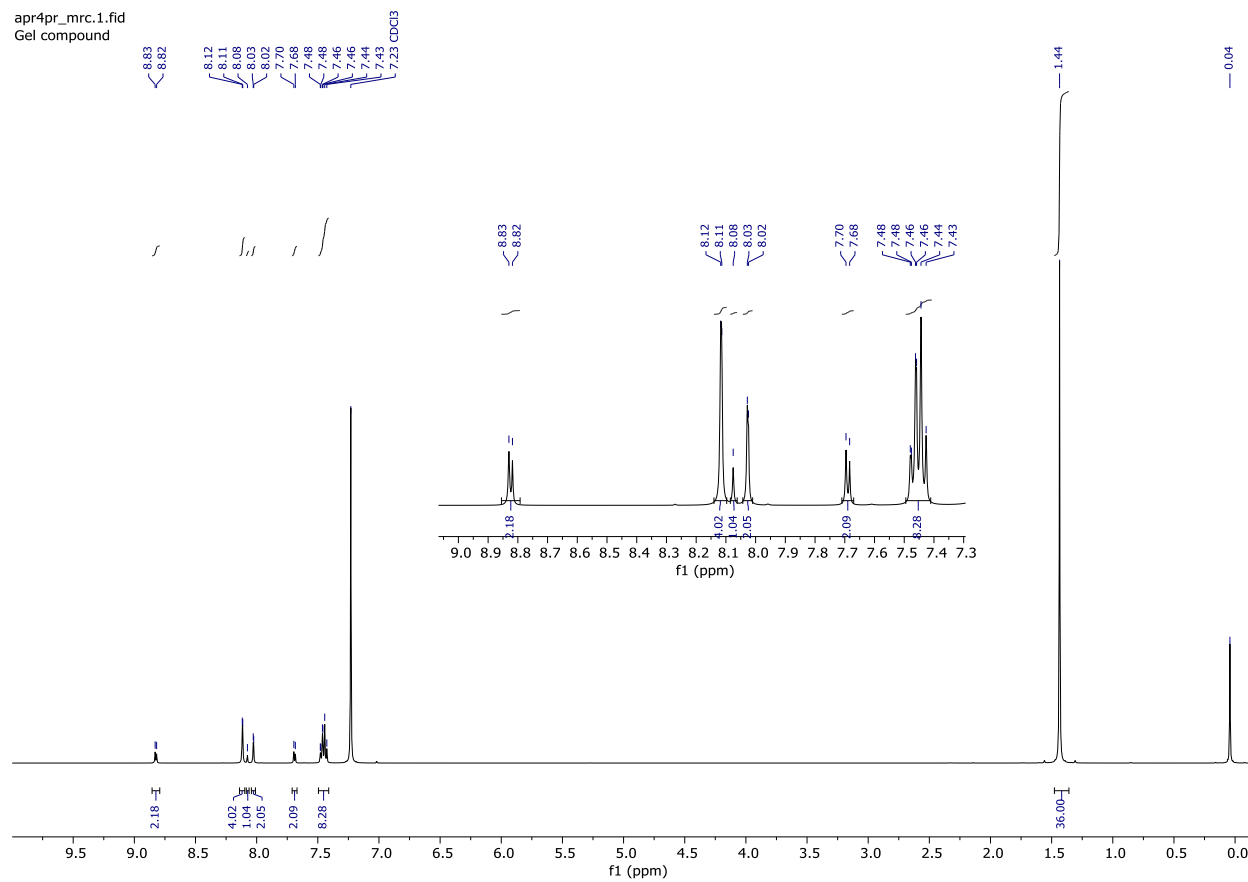

**Fig. S1** <sup>1</sup>H NMR of 4BPY-*m*DTC in CDCl<sub>3</sub>

SURAKSHA-GEL  
single pulse decoupled gated NOE

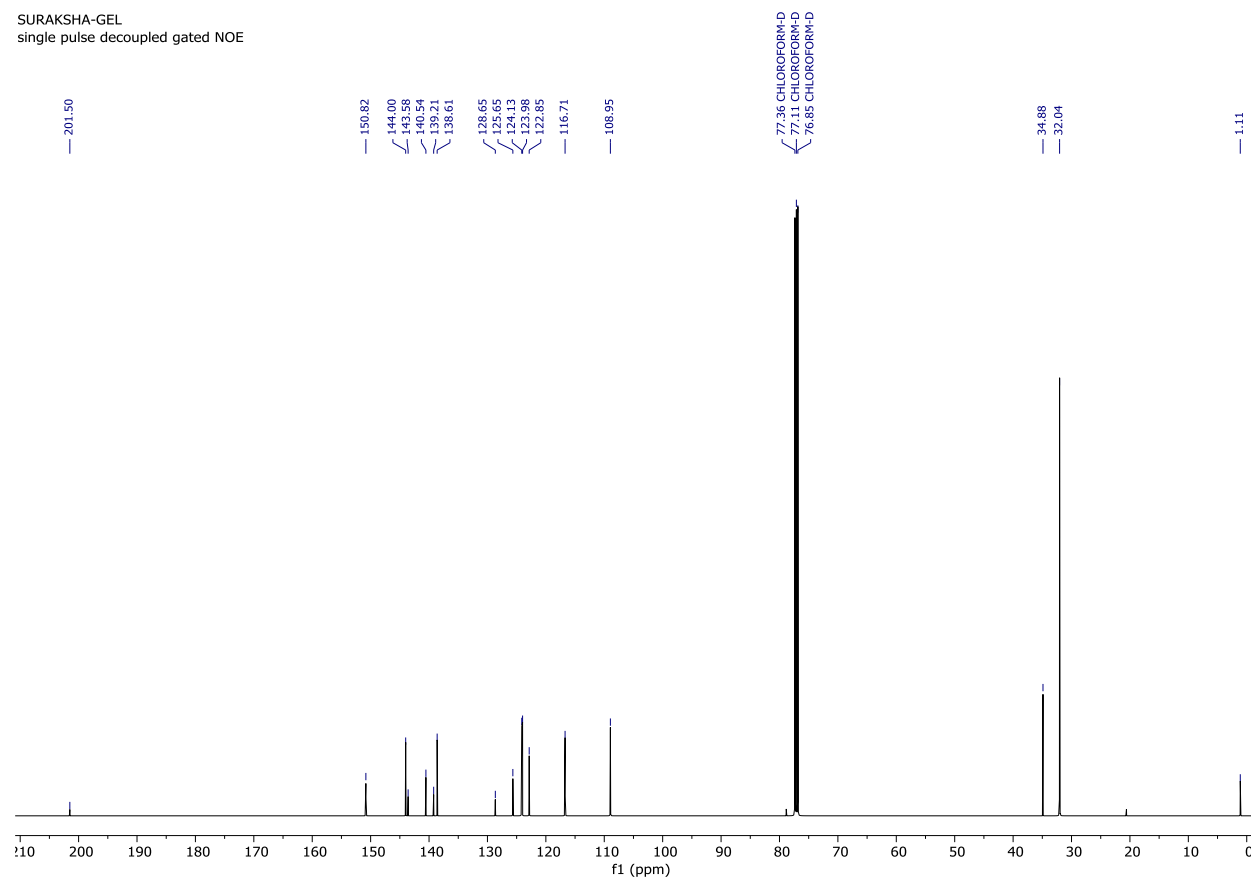

**Fig. S2** <sup>13</sup>C NMR of 4BPy-*m*DTC in CDCl<sub>3</sub>

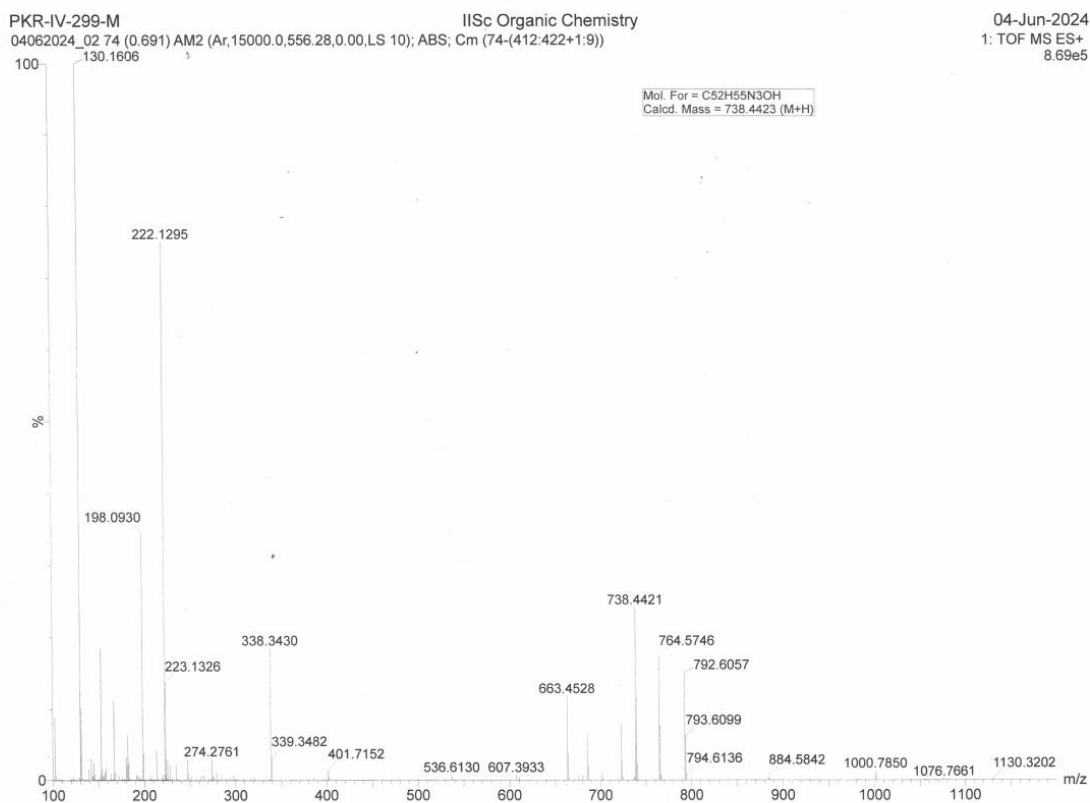

**Fig. S3** HRMS of 4BPy-*m*DTC.

Synthesis of (2,5-bis(3,6-di-*tert*-butyl-9H-carbazol-9-yl)phenyl)(pyridin-4-yl)methanone (BPy-DTC)

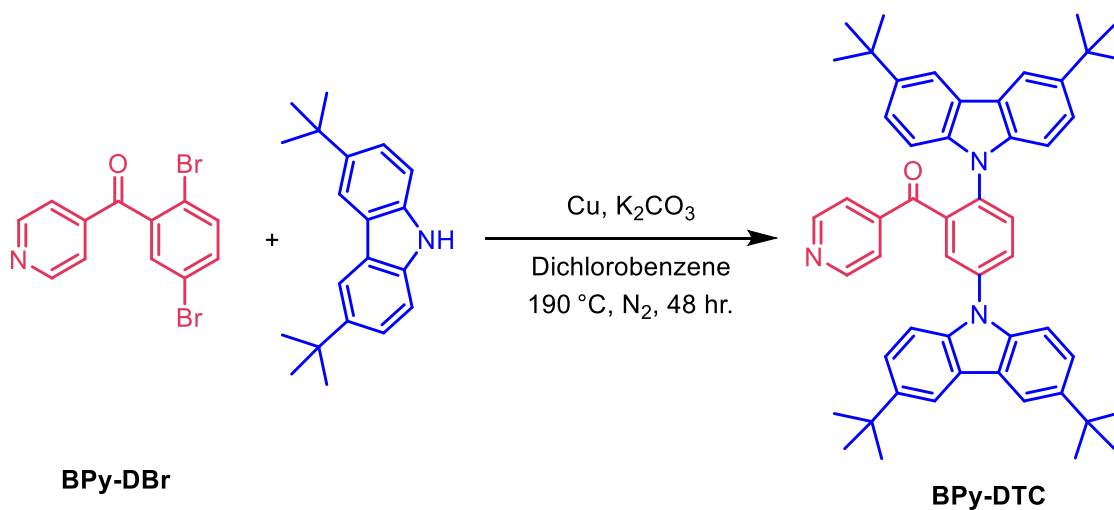

**Scheme S2.** Synthesis of BPy-DTC.

BPy-DTC ((2,5-bis(3,6-di-*tert*-butyl-9*H*-carbazol-9-yl)phenyl)(pyridin-4-yl)methanone) was synthesized using the reported literature.<sup>2</sup> A procedure similar to the synthesis of 4BPy-*m*DTC was used for the synthesis of BPy-DTC using BPy-DBr (2.5 g, 7.33 mmol), 3,6-di-*tert*-butyl-9*H*-carbazole (5.1 g, 18.3 mmol), Cu (0.93 g, 14.7 mmol), K<sub>2</sub>CO<sub>3</sub> (5.06 g, 36.7 mmol) and 1,2-dichlorobenzene (20 mL) to afford (2,5-bis(3,6-di-*tert*-butyl-9*H*-carbazol-9-yl)phenyl)(pyridin-4-yl)methanone) as a light greenish solid (3.4 g, 63% yield); <sup>1</sup>H NMR (500 MHz, CDCl<sub>3</sub>) δ 8.16 (d, *J* = 2.1 Hz, 3H), 8.04 (dd, *J* = 8.3, 2.6 Hz, 1H), 7.87 – 7.83 (m, 3H), 7.79 (d, *J* = 2.1 Hz, 2H), 7.58 – 7.50 (m, 4H), 7.45 (dd, *J* = 8.6, 2.0 Hz, 2H), 6.62 (d, *J* = 6.1 Hz, 2H), 1.47 (s, 18H), 1.42 (s, 18H); <sup>13</sup>C NMR (126 MHz, CDCl<sub>3</sub>) δ 195.10, 148.75, 143.95, 143.90, 142.12, 139.32, 138.77, 138.34, 136.67, 135.12, 131.08, 130.25, 129.09, 124.10, 124.00, 123.88, 123.40, 120.03, 116.65, 116.42, 109.19, 34.92, 34.85, 32.12, 32.04. HRMS (ES<sup>+</sup>-TOF): *m/z* calcd for C<sub>52</sub>H<sub>56</sub>N<sub>3</sub>O [M + H]<sup>+</sup>, 738.4423 found, 738.4427.

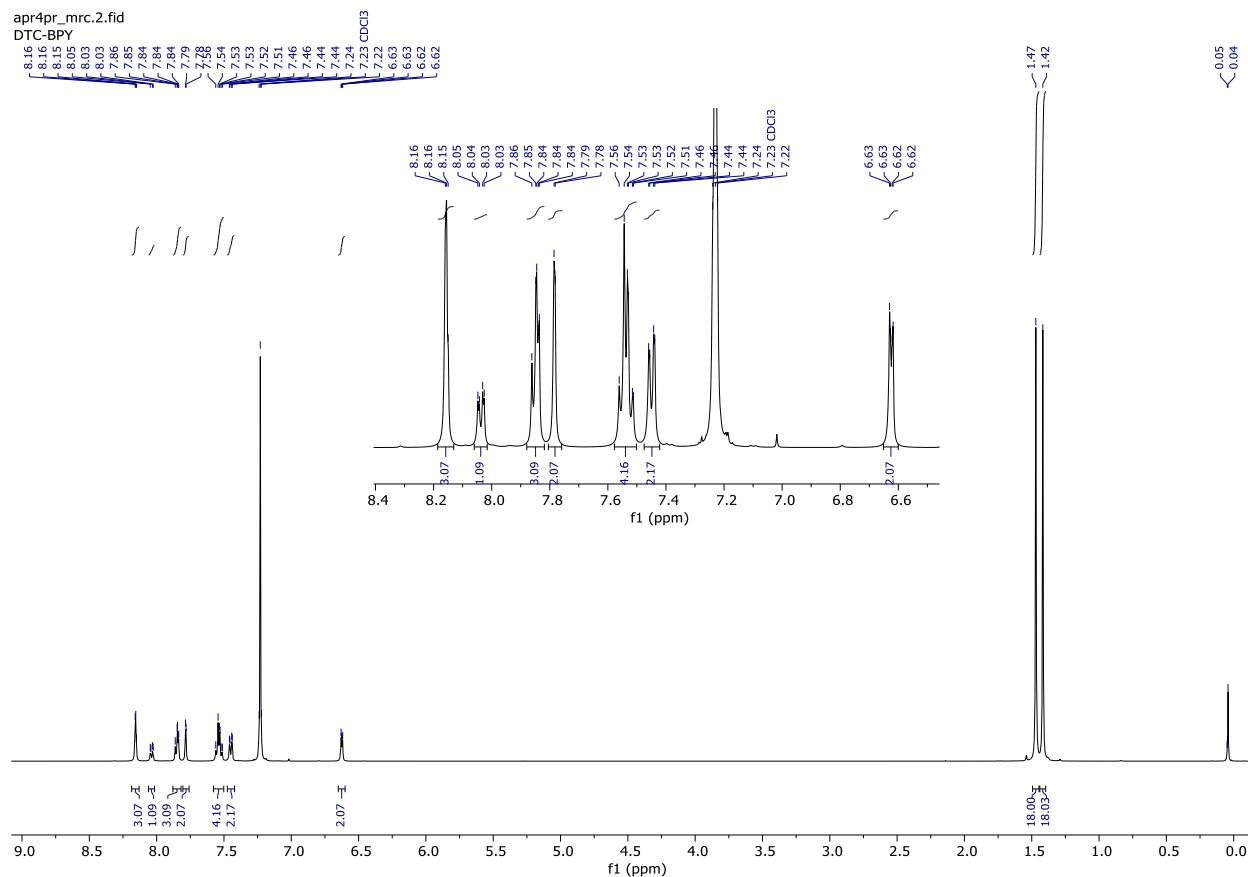

Fig. S4 <sup>1</sup>H NMR of BPy-DTC in CDCl<sub>3</sub>

SURAKSHA-DTC-BPY  
single pulse decoupled gated NOE

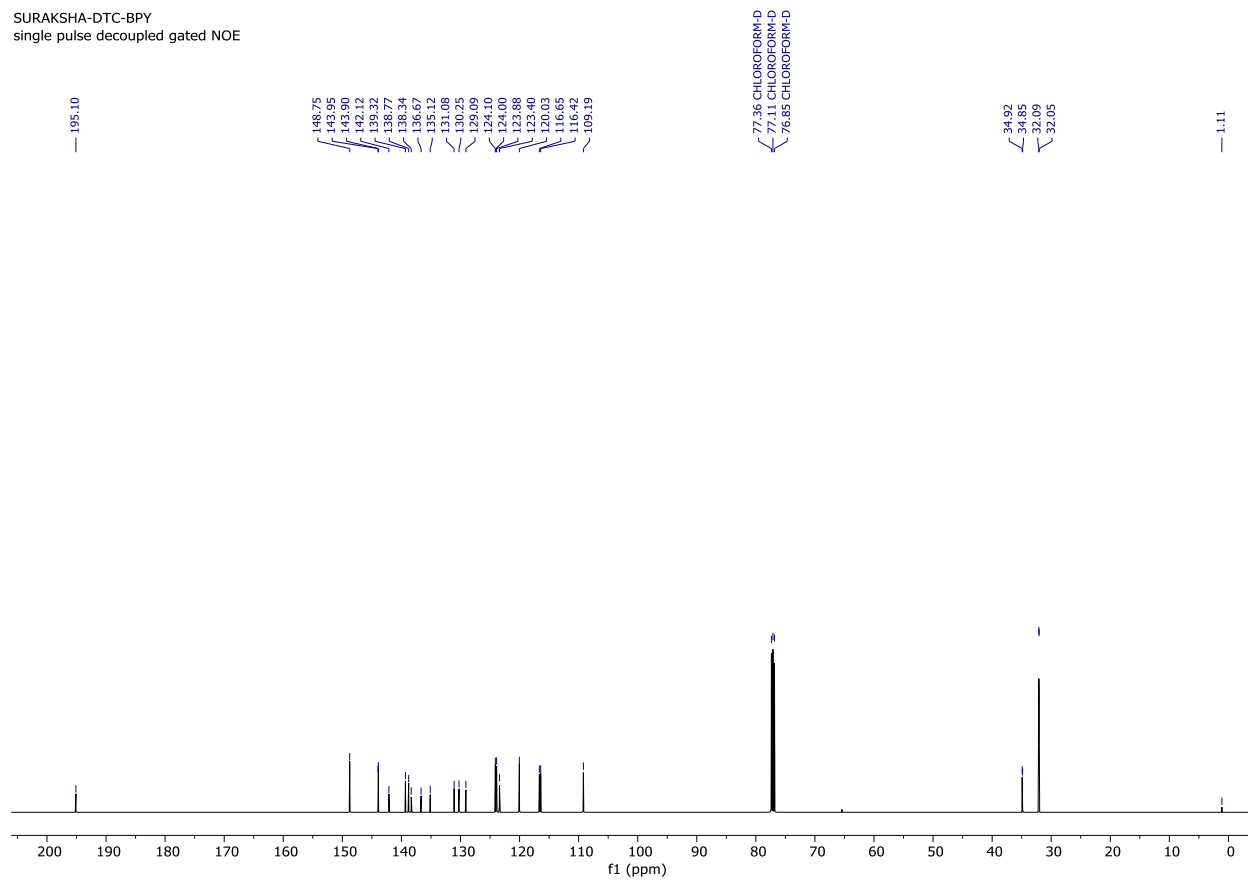

Fig. S5  $^{13}\text{C}$  NMR of BPY-DTC in  $\text{CDCl}_3$



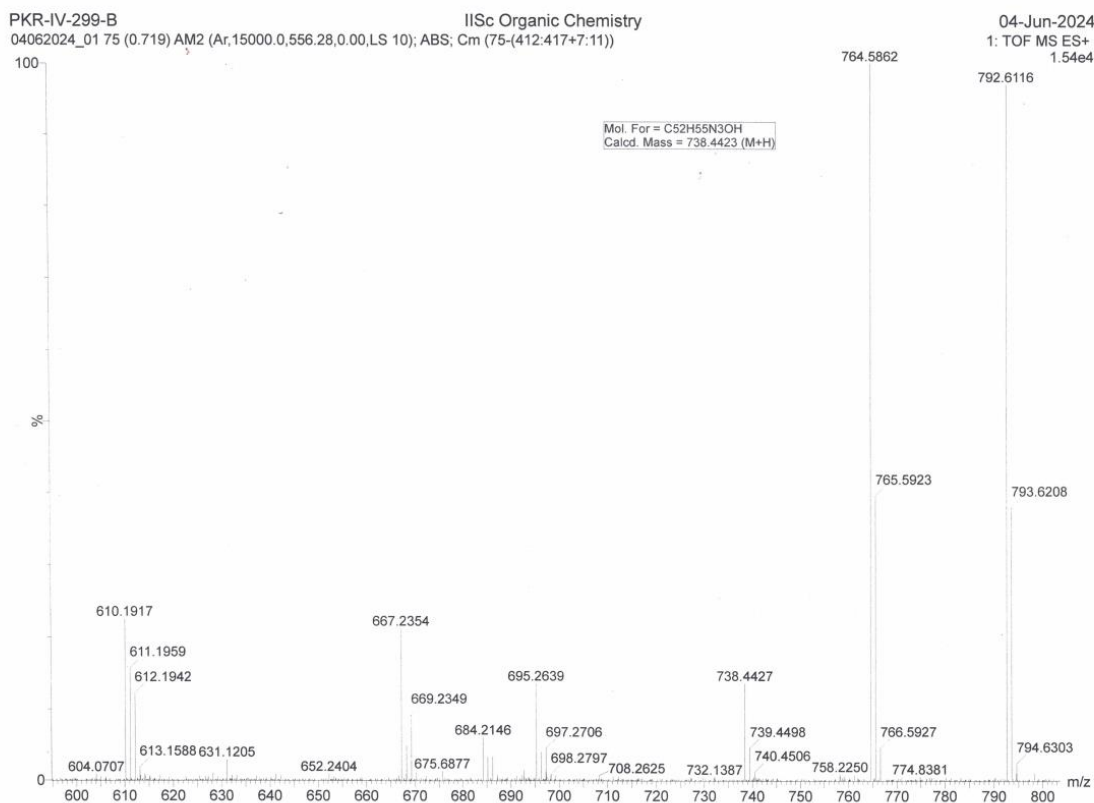

**Fig. S6** HRMS of BPy-DTC.

#### 4. Gelation study

To prepare the gel, 4 mg of 4BPy-*m*DTC was taken in a clean vial and was dissolved in 200  $\mu$ l dichloromethane (DCM). To this solution, methanol (CH<sub>3</sub>OH) was added drop wise followed by sonication, giving intense green emissive fibres. The gelation property of 4BPy-*m*DTC and BPy-DTC in different solvent combinations were checked, and observation are summarised in **Table S1**.

Table S1. Gel formation study of 4BPy-*m*DTC and BPy-DTC in different solvents.

| Solvent-1       | Solvent-2 | 4BPy- <i>m</i> DTC | BPy-DTC |
|-----------------|-----------|--------------------|---------|
| Dichloromethane | Methanol  | Stable gel         | No gel  |
| Dichloromethane | Ethanol   | Stable gel         | No gel  |

|                    |                    |                |        |
|--------------------|--------------------|----------------|--------|
| Dichloromethane    | Isopropanol        | Stable gel     | No gel |
| Dichloromethane    | Nitromethane       | Not stable gel | PPT    |
| Dichloromethane    | Acetonitrile       | No gel         | PPT    |
| Dichloromethane    | Dimethyl sulfoxide | No gel         | PPT    |
| Dichloromethane    | Dimethyl formamide | No gel         | PPT    |
| Ethyl acetate      | Methanol           | Stable gel     | No gel |
| Ethyl acetate      | n-Hexane           | No gel         | No gel |
| Ethyl acetate      | Aniline            | No gel         | No gel |
| Tetrahydrofuran    | Methanol           | Not stable gel | PPT    |
| Tetrahydrofuran    | Ethanol            | Not stable gel | PPT    |
| Tetrahydrofuran    | Water              | Not stable gel | PPT    |
| Acetone            | Methanol           | Not stable gel | No gel |
| Dimethyl sulfoxide | Methanol           | PPT            | No gel |
| Dimethyl formamide | Dimethyl sulfoxide | PPT            | No gel |

## 5. Rheology study

Theological studies of 4BPy-*m*DTC gel were performed in DCM+ CH<sub>3</sub>OH solvent mixture. The viscosity vs shear stress plot shows a gradual decrease in the viscosity with increasing the stress (Fig. S7a). The amplitude sweep experiment shows that at lower shear strain range, storage modulus ( $G'$ ) shows higher value than the loss modulus ( $G''$ ), representing the dominance of elastic nature of the gel.<sup>3</sup> At 8.71% shear strain,  $G'$  intercept  $G''$  and this point corresponds to gel to sol phase transition point (Fig. S7b).

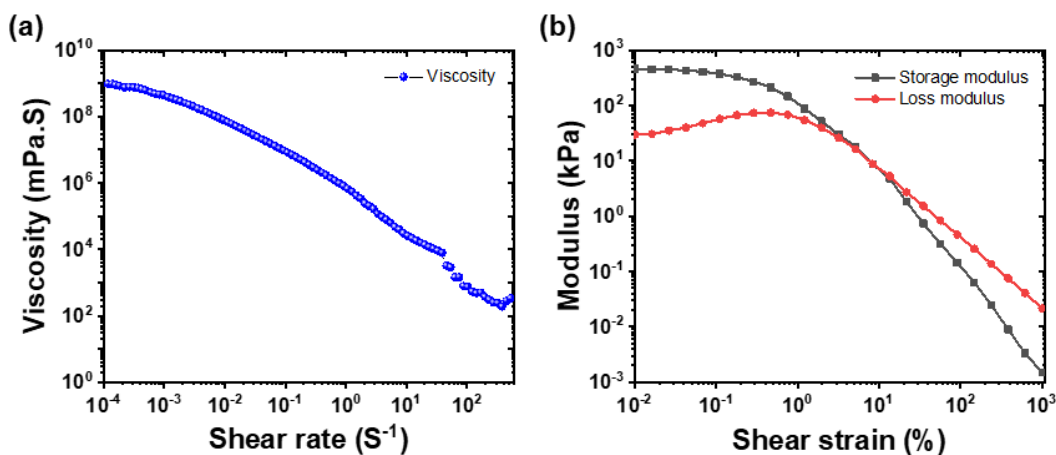

**Fig. S7** (a) Viscosity vs shear stress plot; (b) amplitude sweep measurement plot of 4BPy-*m*DTC organogel in DCM+ CH<sub>3</sub>OH.

## 6. CSLM images

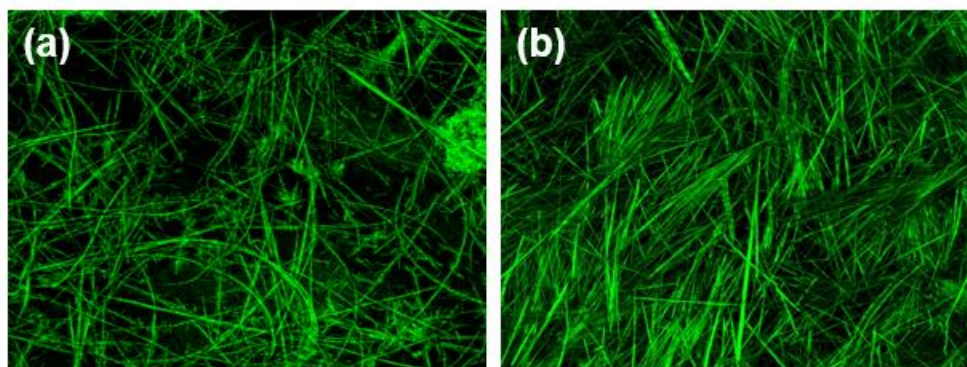

**Fig. S8** Confocal scanning laser microscopic images of 4BPy-*m*DTC gel (a) in DCM + CH<sub>3</sub>OH solvent mixture at CGC; (b) in diluted DCM + CH<sub>3</sub>OH solvent mixture.

## 7. Single crystal XRD

While solving the crystal structures for 4BPy-*m*DTC, there are some B-level alerts remains, which are mainly coming from solvent disorder.

Table S2. Crystal data and structure refinement for 4BPy-*m*DTC

|                     |                                                  |
|---------------------|--------------------------------------------------|
| Identification code | 4BPy- <i>m</i> DTC                               |
| Empirical formula   | C <sub>52</sub> H <sub>55</sub> N <sub>3</sub> O |

---

|                                     |                                                                                                                    |
|-------------------------------------|--------------------------------------------------------------------------------------------------------------------|
| Formula weight                      | 855.11                                                                                                             |
| Temperature                         | 120 K                                                                                                              |
| Wavelength                          | 0.71073 Å                                                                                                          |
| Crystal system                      | Triclinic                                                                                                          |
| Space group                         | P -1 P -1                                                                                                          |
| Unit cell dimensions                | a=12.2185(17) Å, b=12.7948(17) Å, c=16.259(2) Å<br>$\alpha = 95^\circ$ , $\beta = 93^\circ$ , $\gamma = 102^\circ$ |
| Volume (Reported)                   | 2466.1(6)                                                                                                          |
| Z (Reported)                        | 2                                                                                                                  |
| Density (Reported)                  | 1.152 gcm <sup>-3</sup>                                                                                            |
| Absorption coefficient              | 0.070 mm <sup>-1</sup>                                                                                             |
| F(000)                              | 916.0                                                                                                              |
| Crystal size                        | 0.30 x 0.15 x 0.15 mm <sup>3</sup>                                                                                 |
| Theta range for data collection     | 2.61 to 27.50°                                                                                                     |
| Index ranges                        | -14 ≤ h ≤ 15, -16 ≤ k ≤ 16, -21 ≤ l ≤ 21                                                                           |
| Reflections collected               | 47148                                                                                                              |
| Independent reflections             | 11327 [R(int) = 0.0309]                                                                                            |
| Completeness to theta = 27.598      | 99%                                                                                                                |
| Absorption correction               | Multi-scan                                                                                                         |
| Maximum and minimum transmission    | 0.7455 to 0.6965                                                                                                   |
| Refinement method                   | Full-matrix least-squares on F <sup>2</sup>                                                                        |
| Data/ restraints/ parameters        | 11327/ 0/ 597                                                                                                      |
| Goodness- of- fit on F <sup>2</sup> | 0.944                                                                                                              |

---

|                                      |                                   |
|--------------------------------------|-----------------------------------|
| Final R indices [ $I > 2\sigma(I)$ ] | R1 = 0.0590 and wR2 = 0.1644      |
| R indices (all data)                 | R1 = 0.0696 and wR2 = 0.1742      |
| Largest diff. peak and hole          | 0.564 and -0.619 e $\text{\AA}^3$ |
| CCDC                                 | 2329995                           |

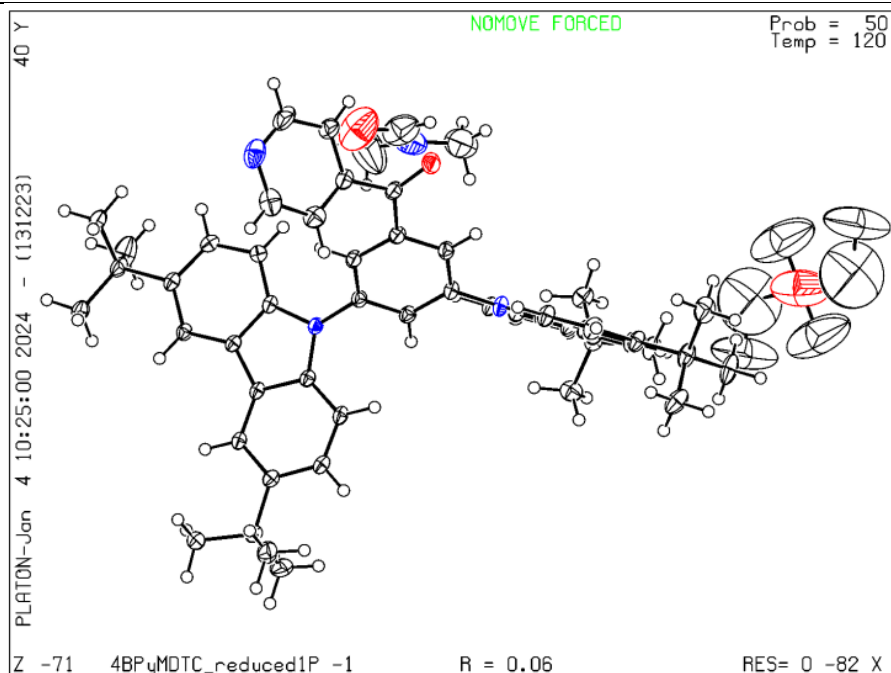

**Fig. S8** View of 4BPY-*m*DTC obtained from single crystal XRD analysis (CCDC: 2329995). Displacement ellipsoid representation for 4BPY-*m*DTC (ellipsoids are drawn at 50% probability).

Table S3. Crystal data and structure refinement for BPy-DTC<sup>2</sup>

|                     |                                                  |
|---------------------|--------------------------------------------------|
| Identification code | BPy-DTC                                          |
| Empirical formula   | C <sub>52</sub> H <sub>55</sub> N <sub>3</sub> O |
| Formula weight      | 737.99                                           |
| Temperature         | 296 K                                            |
| Wavelength          | 1.54178 $\text{\AA}$                             |
| Crystal system      | Monoclinic                                       |
| Space group         | P 21/c                                           |

---

|                                     |                                                                                                            |
|-------------------------------------|------------------------------------------------------------------------------------------------------------|
| Unit cell dimensions                | a=16.3143(3) Å, b=19.5553(4) Å, c=13.7512(2) Å<br>$\alpha = 90^\circ, \beta = 93^\circ, \gamma = 90^\circ$ |
| Volume (Reported)                   | 4380.94(14)                                                                                                |
| Z (Reported)                        | 4                                                                                                          |
| Density (Reported)                  | 1.119 gcm <sup>-3</sup>                                                                                    |
| Absorption coefficient              | 0.505 mm <sup>-1</sup>                                                                                     |
| F(000)                              | 1584.0                                                                                                     |
| Crystal size                        | 0.30 x 0.15 x 0.15 mm <sup>3</sup>                                                                         |
| Theta range for data collection     | 2.7123 to 66.2445°                                                                                         |
| Index ranges                        | -19 ≤ h ≤ 19, -23 ≤ k ≤ 23, -7 ≤ l ≤ 16                                                                    |
| Reflections collected               | 29531                                                                                                      |
| Independent reflections             | 7571 [R(int) = 0.0322]                                                                                     |
| Completeness to theta = 66.660      | 97.6%                                                                                                      |
| Absorption correction               | Multi-scan                                                                                                 |
| Maximum and minimum transmission    | 0.9492 and 0.8437                                                                                          |
| Refinement method                   | Full-matrix least-squares on F <sup>2</sup>                                                                |
| Data/ restraints/ parameters        | 7571/ 522/ 678                                                                                             |
| Goodness- of- fit on F <sup>2</sup> | 1.027                                                                                                      |
| Final R indices [I>2sigma(I)]       | R1 = 0.0529 and wR2 = 0.1454                                                                               |
| R indices (all data)                | R1 = 0.0703 and wR2 = 0.1605                                                                               |
| Largest diff. peak and hole         | 0.233 and -0.178 e Å <sup>3</sup>                                                                          |
| CCDC                                | 1419353                                                                                                    |

---

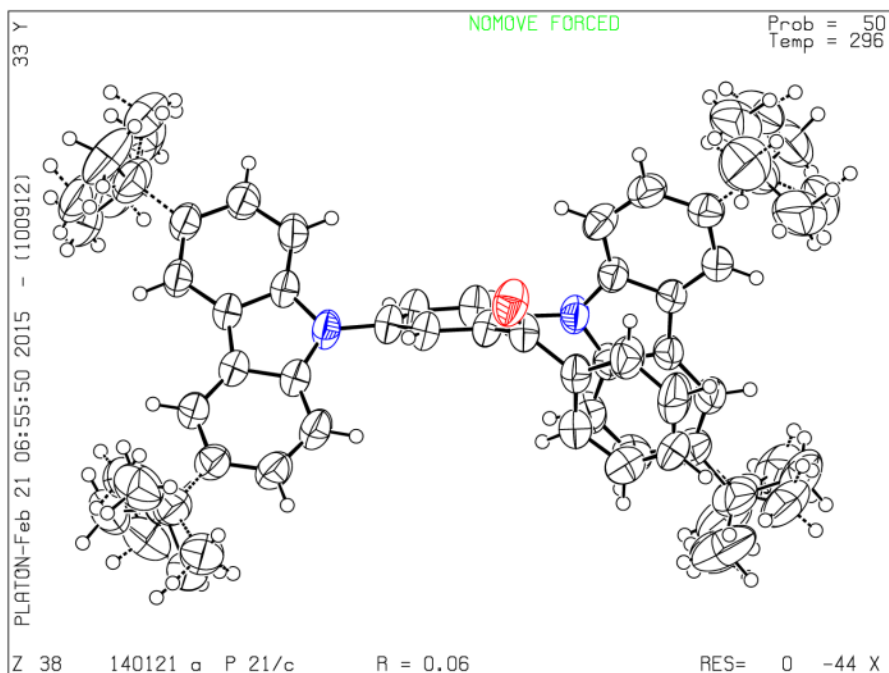

**Fig. S9** View of BPy-DTC obtained from single crystal XRD analysis (CCDC: 1419353). Displacement ellipsoid representation for BPy-DTC (ellipsoids are drawn at 50% probability).

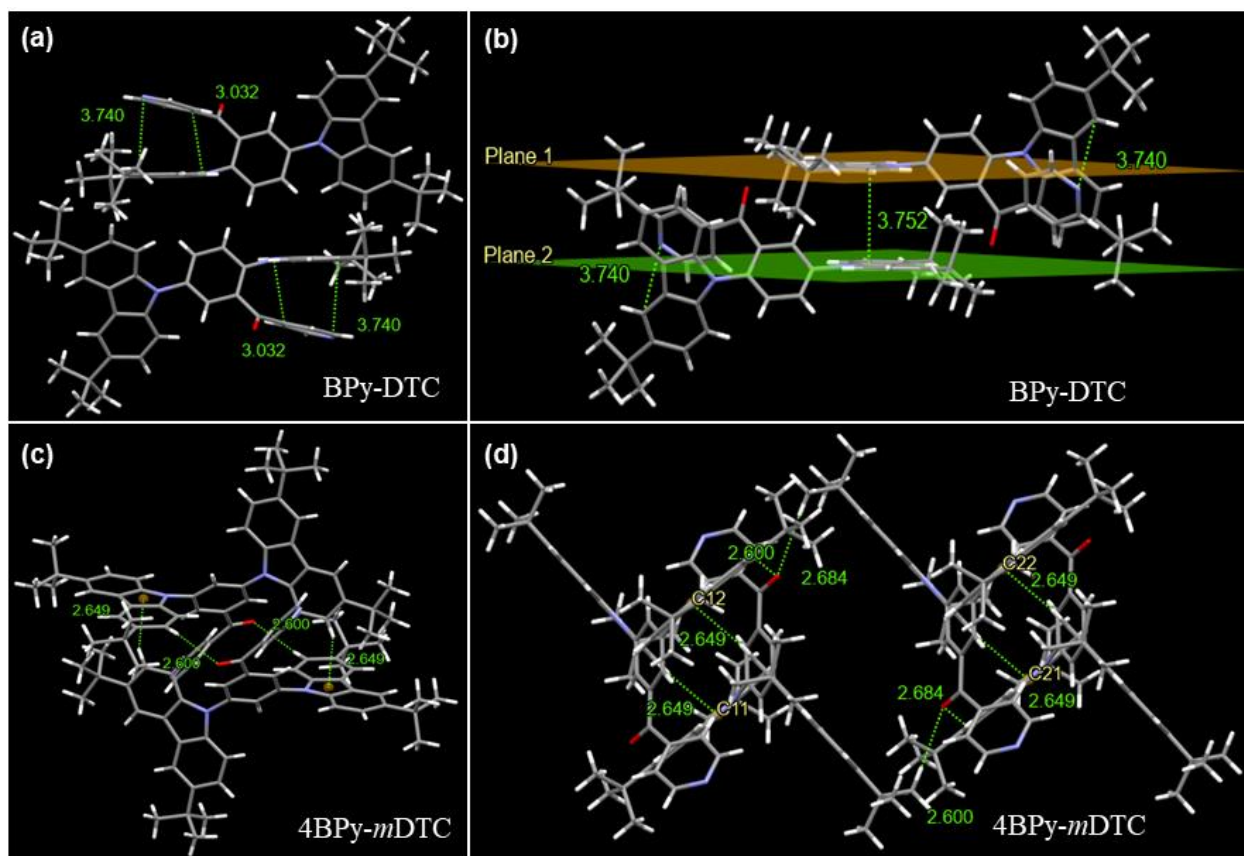

**Fig. S10** (a) BPy-DTC dimer showing intramolecular interaction; (b) BPy-DTC dimer with  $\pi\cdot\pi$  stacking; (c) 4BPy-mDTC dimer interacting through  $\text{CH}\cdots\pi$  and  $\text{CO}\cdots\text{H}$  interactions; (d) two dimers of 4BPy-mDTC interacting through  $\text{CH}\cdots\pi$  interaction; [Colour code; grey = carbon; white = hydrogen; blue = nitrogen; red = oxygen].

## 8. Thin film XRD

For the small angle thin film XRD analysis the wavelength ( $\lambda$ ) of the X-ray used was 1.54 Å.

d-spacing was calculated using the equation.<sup>4</sup>

$$n\lambda = 2d \times \sin \theta \quad (1)$$

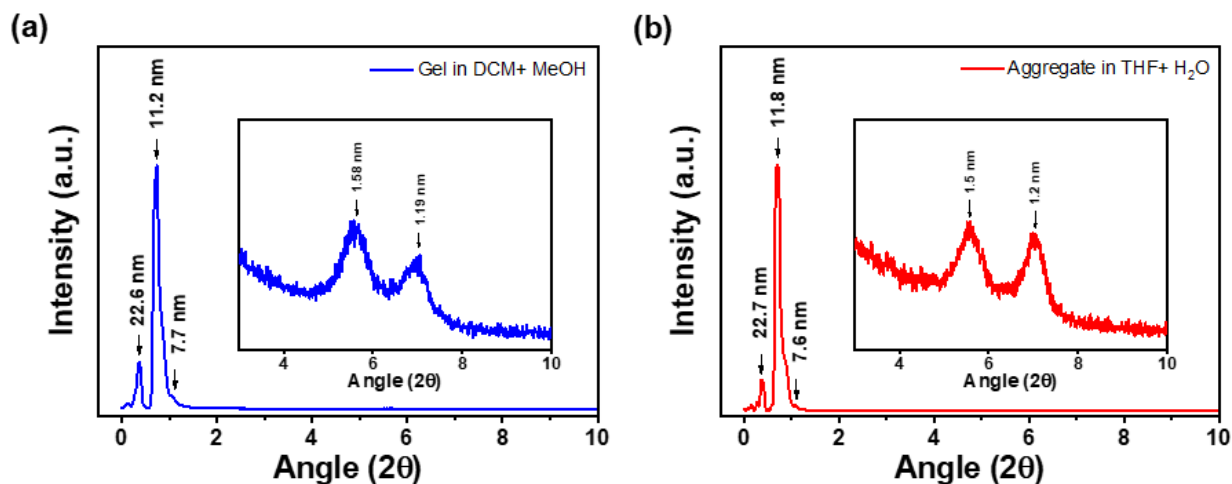

**Fig. S11** Small angle thin film XRD of (a) 4BPy-*m*DTC fibrous gel obtained in DCM+ CH<sub>3</sub>OH solvent fixture; (b) Fettuccine aggregate obtained in THF+ H<sub>2</sub>O solvent mixture.

## 9. Photophysical studies

Absorbance and PL measurement of 4BPy-*m*DTC. In toluene solution emitter shows a broad absorption band at 370 nm. The emission maxima ( $\lambda_{\text{max}}$ ) of toluene solution and gel film is nearly same, but the gel film has shorter FWHM due to enhanced rigidity.



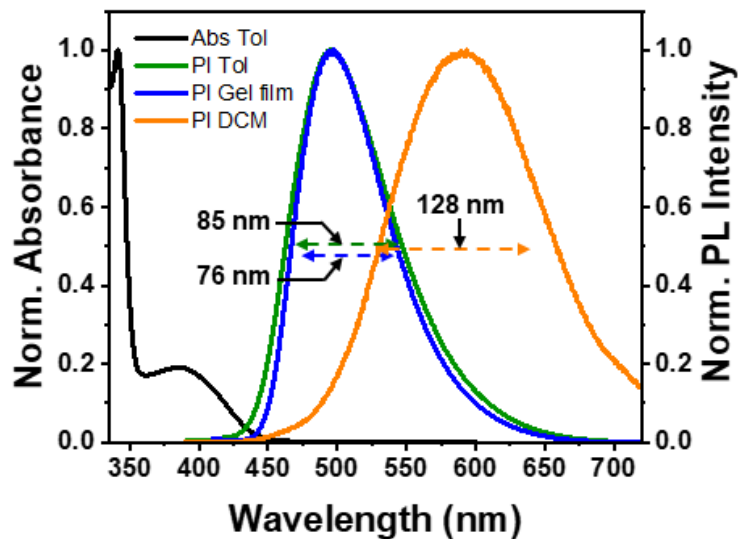

**Fig. S12** Absorbance of 4BPy-*m*DTC in toluene solution; PL of 4BPy-*m*DTC in toluene, dichloromethane, and in gel film.

AIE study of 4BPy-*m*DTC in THF+ H<sub>2</sub>O solvent mixture with varying water volume fraction. Clearly the PL intensity of initial THF solution is more than the aggregated solution.

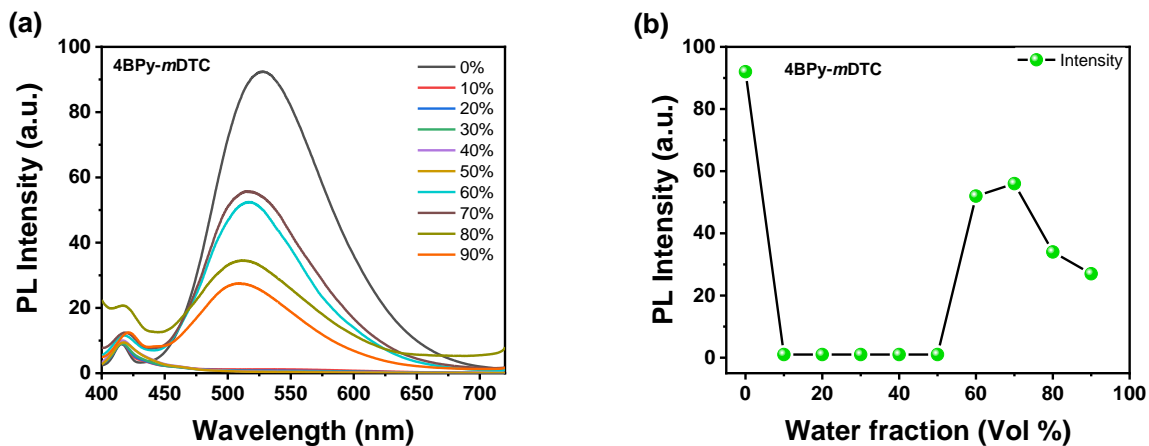

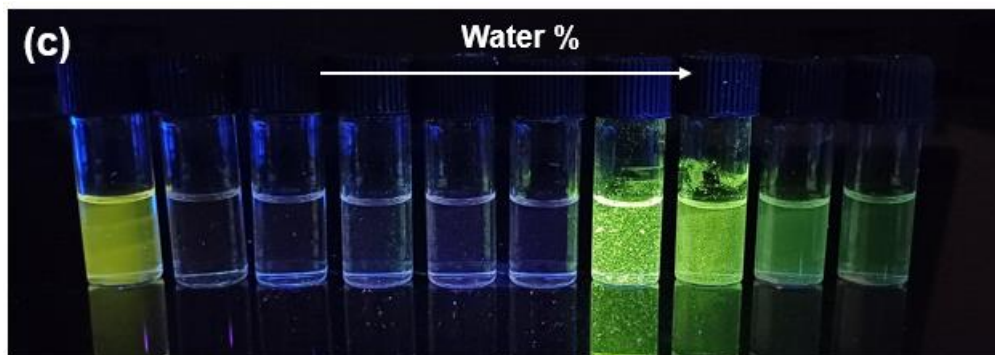

**Fig. S13** AIE study of 4BPy-*m*DTC in THF+ H<sub>2</sub>O solvent mixture with increasing water volume fraction; (a) PL intensity of 4BPy-*m*DTC in THF solution with different water volume fraction; (b) water volume fraction Vs PL intensity plot; (c) digital photograph of AIE study.

Absorption band of 4BPy-*m*DTC fibrous gel formed in DCM+ CH<sub>3</sub>OH solvent mixture and toluene solution were compared.

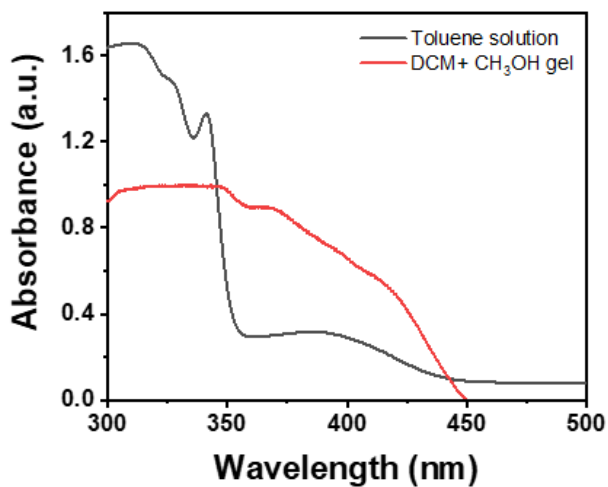

**Fig. S14** Absorbance comparison of 4BPy-*m*DTC in toluene solution and in DCM+ CH<sub>3</sub>OH fibrous gel.

## 10. Powder XRD

For the powder XRD analysis the wavelength ( $\lambda$ ) of the X-ray used was 1.5406 Å.

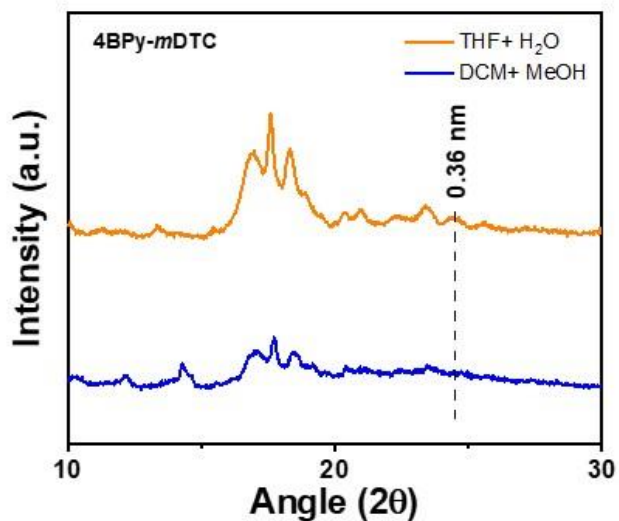

**Fig. S15** Powder XRD of 4BPy-*m*DTC self-assembly formed in DCM+ CH<sub>3</sub>OH and in THF+ H<sub>2</sub>O solvent mixture.

## 11. Lifetime measurement

Ignoring the non-radiative decay from T<sub>1</sub> to S<sub>0</sub>, the rate constants of all transitions were calculated using below equations (I to VII).<sup>5, 6</sup> The rate constant values are mentioned in **Table S4**.

$$K_p(R) = \varphi_p / \tau_p \quad (I)$$

$$K_p(T) = 1 / \tau_p \quad (II)$$

$$K_D(R) = \varphi_D / \tau_D \quad (III)$$

$$K_D(T) = 1 / \tau_D \quad (IV)$$

$$K_{IC} = K_p(T) - [K_p(R) + K_{ISC}] \quad (V)$$

$$K_{ISC} = [\varphi_D + K_{ISC}] / \varphi_T \quad (VI)$$

$$K_{RISC} = [K_D(T) \times K_p(T) \times \varphi_D] / [\varphi_T \times K_{ISC}] \quad (VII)$$

Where,

$\varphi_T$  is the total PLQY under inert condition

$\varphi_p$  is the PLQY under air

$\tau_p$  and  $\tau_d$  are the prompt and delayed lifetimes, respectively

$K_P(R)$  is the prompt radiative rate constant

$K_P(T)$  is the total prompt rate constant

$K_D(R)$  is the delayed radiative rate constant

$K_D(T)$  is the total delayed rate constant

$K_{IC}$  is the internal conversion rate constant

$K_{ISC}$  is the intersystem crossing rate constant

$K_{RISC}$  is the reverse intersystem crossing rate constant.

Table S4. Transient lifetime measurement of 4BPy-*m*DTC.

| Emitter | $\phi_T$<br>/% | $\phi_P$<br>/% | $\tau_p$<br>/ns | $\tau_D$<br>/us | $K_{P(R)}$<br>/s <sup>-1</sup> | $K_{P(T)}$<br>/s <sup>-1</sup> | $K_{D(R)}$<br>/s <sup>-1</sup> | $K_{D(T)}$<br>/s <sup>-1</sup> | $K_{IC}$<br>/s <sup>-1</sup> | $K_{ISC}$<br>/s <sup>-1</sup> | $K_{RISC}$<br>/s <sup>-1</sup> |
|---------|----------------|----------------|-----------------|-----------------|--------------------------------|--------------------------------|--------------------------------|--------------------------------|------------------------------|-------------------------------|--------------------------------|
| Gel     | 36.<br>0       | 22.<br>0       | 10.<br>5        | 41.<br>7        | 2.1 x<br>10 <sup>7</sup>       | 0.9 x<br>10 <sup>8</sup>       | 0.3 x<br>10 <sup>4</sup>       | 2.4 x<br>10 <sup>4</sup>       | 3.7 x<br>10 <sup>7</sup>     | 3.7 x<br>10 <sup>7</sup>      | 0.4 x<br>10 <sup>5</sup>       |
| Tol     | 7.5            | 1.7            | 2.0             | 0.5             | 0.8 x<br>10 <sup>7</sup>       | 5.0 x<br>10 <sup>8</sup>       | 1.3 x<br>10 <sup>5</sup>       | 2.2 x<br>10 <sup>6</sup>       | 1.0 x<br>10 <sup>8</sup>     | 3.8 x<br>10 <sup>8</sup>      | 12.4<br>x 10 <sup>6</sup>      |

## 12. Electrical conductivity measurement

For electrical conductivity measurement, on a glass plate two strips of silver (Ag) layers were deposited. The Ag layer is used as electrode and the distance between them was maintained as 3 mm. On top of the electrode, gels were drop casted. By applying voltage (from -20 V to +20V) across the electrode the corresponding current values were recorded.<sup>7, 8</sup>

$$R = V/I = \rho (L/A) = 1/G$$

$$\sigma = 1/\rho$$

$$R = 1/ \text{slop}$$

Table S5. Conductivity measurement parameters for 4BPy-*m*DTC self-assembly

| Parameters                            | Assembly in DCM+ CH <sub>3</sub> OH | Assembly in THF+ H <sub>2</sub> O |
|---------------------------------------|-------------------------------------|-----------------------------------|
| Slop from linear fitting of I-V curve | 4.45833 x 10 <sup>-7</sup>          | 2.52254 x 10 <sup>-6</sup>        |
| Resistance (R)                        | 0.222429 x 10 <sup>7</sup> Ω        | 0.39642 x 10 <sup>6</sup> Ω       |
| Length between two electrodes (L)     | 0.003 m                             | 0.003 m                           |
| Cross sectional area of gel film (A)  | 0.00000166 m <sup>2</sup>           | 0.00000125 m <sup>2</sup>         |
| Conductance (G)                       | 4.45833 x 10 <sup>-7</sup> S        | 2.52254 x 10 <sup>-6</sup> S      |
| Resistivity (ρ)                       | 1241.07 Ω m                         | 165.175 Ω m                       |
| Conductivity (σ)                      | 8.05 x 10 <sup>-4</sup> S/m         | 6.05 x 10 <sup>-3</sup> S/m       |

### 13. Reference

1. P. Rajamalli, V. Thangaraji, N. Senthilkumar, C.-C. Ren-Wu, H.-W. Lin and C.-H. Cheng, *Journal of Materials Chemistry C*, 2017, **5**, 2919-2926.
2. P. Rajamalli, N. Senthilkumar, P. Gandeepan, P.-Y. Huang, M.-J. Huang, C.-Z. Ren-Wu, C.-Y. Yang, M.-J. Chiu, L.-K. Chu, H.-W. Lin and C.-H. Cheng, *Journal of the American Chemical Society*, 2016, **138**, 628-634.
3. A. Mondal, S. I. Chaudhury, S. Lyndem, S. Rana, D. L. Nongbri, K. Aguan and A. Singha Roy, *New Journal of Chemistry*, 2024, **48**, 4865-4879.
4. P. Xue, R. Lu, G. Chen, Y. Zhang, H. Nomoto, M. Takafuji and H. Ihara, *Chemistry – A European Journal*, 2007, **13**, 8231-8239.
5. Y. Wada, H. Nakagawa, S. Matsumoto, Y. Wakisaka and H. Kaji, *Nature Photonics*, 2020, **14**, 643-649.
6. N. Yadav, U. Deori, E. Ravindran, B. Sk and P. Rajamalli, *Journal of Materials Chemistry C*, 2023, **11**, 16368-16376.
7. S. Satapathy and E. Prasad, *ACS Applied Materials & Interfaces*, 2016, **8**, 26176-26189.
8. N. Gulzar, K. Zubair, M. F. Shakir, M. Zahid, Y. Nawab and Z. A. Rehan, *Journal of Superconductivity and Novel Magnetism*, 2020, **33**, 3519-3524.
